# Supplementary material
Source: publisher site journal article supplement (https://www.spandidos-publications.com/3913/downloadSupplementary)

Figure S1. Representative images of cell migration and invasion assays. (A) Representative images of the cell migration assay presented in Fig. 6B (magnification, x400). (B) Representative images of the cell invasion assay presented in Fig. 6C (magnification, x400). C, control; NC, negative control; miR, microRNA.

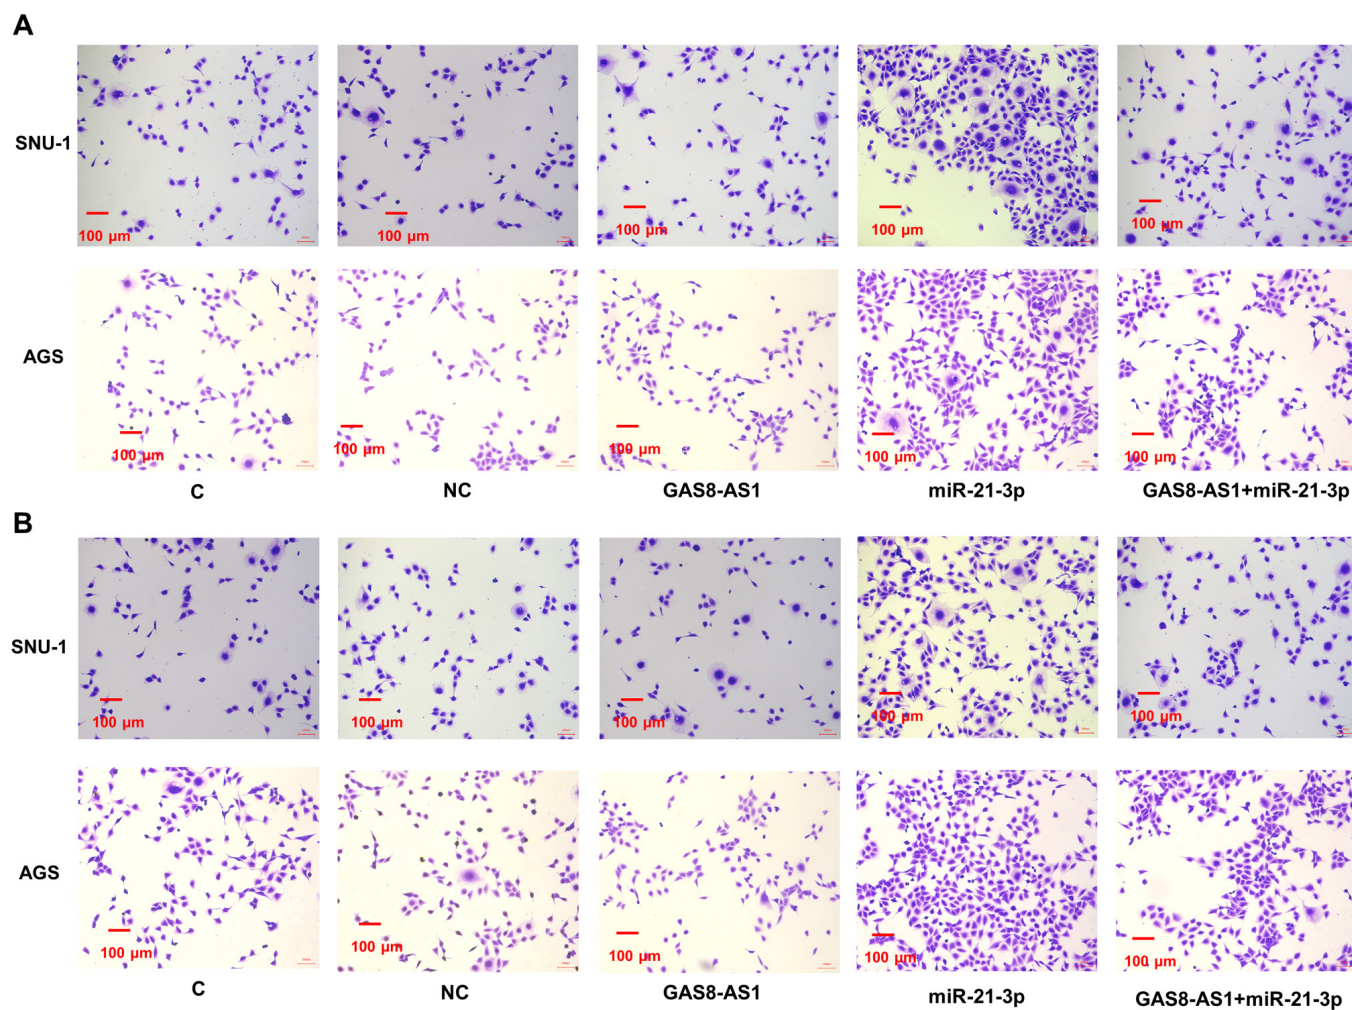

Supplement: Supplementary file 1 [file downloadSupplementary]
